# Supplementary material
Source: PubMed Central journal article supplement (PMC5812936)
Supplement: AEM.01851-17_zam005188338s1.pdf [file AEM.01851-17_zam005188338s1.pdf]

## **Supplemental Material**

### **Differential Engagement of Fermentative Taxa in Gut Contents of the Earthworm *Lumbricus terrestris***

Anja B. Meier, Sindy Hunger, and Harold L. Drake\*

Department of Ecological Microbiology, University of Bayreuth, 95440 Bayreuth,  
Germany

**\*Corresponding author:** Harold L. Drake, Department of Ecological Microbiology,  
University of Bayreuth, 95440 Bayreuth, Germany. Tel: (49) (0)921-555640. Fax: (49)  
(0)921-555793. E-Mail: [HLD@uni-bayreuth.de](mailto:HLD@uni-bayreuth.de).

## Supplemental Figure Legends

**Figure S1. Rarefaction curves of 16S rRNA sequences obtained from different gut content saccharide treatments.** Each curve is based on phylotypes with a 99% sequence similarity (1). The narrow solid lines correspond to a confidence interval of 95%. The taxonomic distribution of the sequences is shown in Figure 2.

**Figure S2. Rarefaction curves of 16S rRNA sequences obtained from the time-dependent product profiles of the glucose treatment.** Each curve is based on phylotypes with a 99% sequence similarity (1). The narrow solid lines correspond to a confidence interval of 95%. The taxonomic distribution of the sequences is shown in Figure 4.

### Reference for Supplemental Figure Legends

1. Stackebrandt E, Ebers J. 2006. Taxonomic parameters revisited: Tarnished gold standards. *Microb Today* 33:152–155.

Figure S1

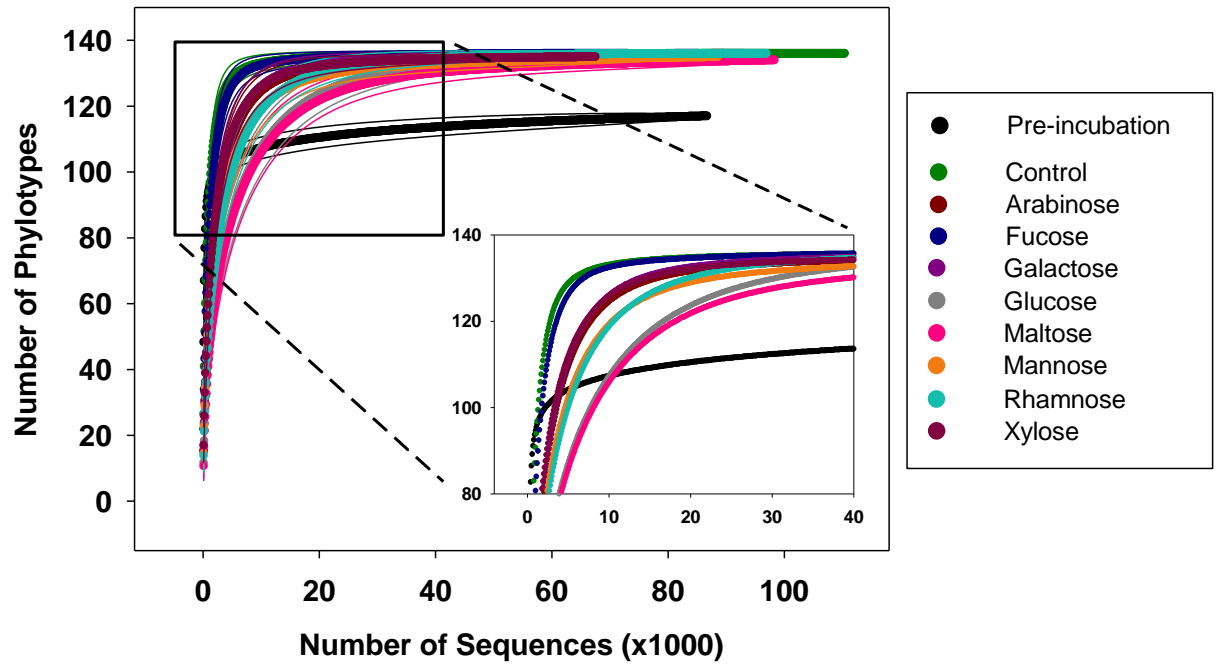

Figure S2

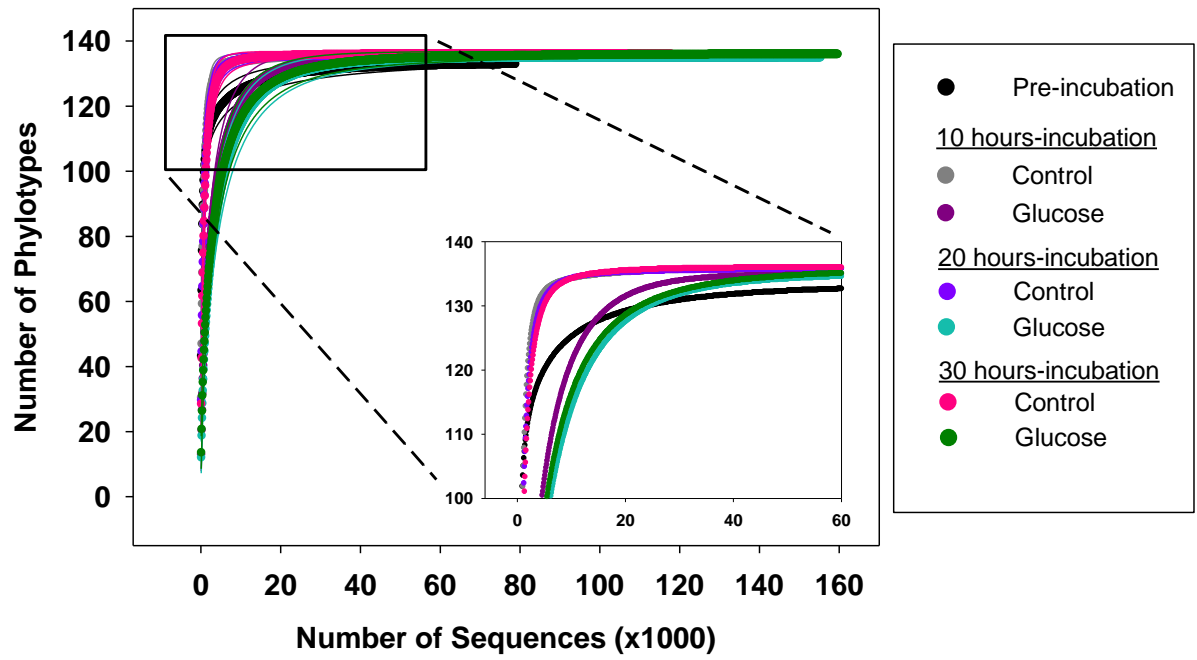

**Table S1. Statistical p-values of the products formed in (A) different saccharide treatments and (B) the time-resolved fermentation of glucose.<sup>a,b</sup>**

**(A) Different saccharide treatments (main data are in Figure 1 and Table 1)**

**ARABINOSE**

|                   | Succinate |      | Formate |      | Propionate |      | Ethanol |       | Lactate |       | Acetate |      | H <sub>2</sub> |       | CO <sub>2</sub> |      |
|-------------------|-----------|------|---------|------|------------|------|---------|-------|---------|-------|---------|------|----------------|-------|-----------------|------|
|                   | C         | A    | C       | A    | C          | A    | C       | A     | C       | A     | C       | A    | C              | A     | C               | A    |
| <b>Mean value</b> | 0.00      | 8.93 | 1.53    | 3.1  | 7.04       | 9.54 | 2.41    | 41.55 | -3.11   | -3.44 | 13.3    | 44.4 | 1.39           | 52.96 | 23.1            | 87.2 |
| <b>variance</b>   | 0.00      | 0.55 | 0.13    | 0.05 | 0.24       | 2.94 | 9.45    | 0.07  | 0.06    | 0.08  | 1.11    | 5.5  | 0.19           | 15.61 | 8.72            | 7.89 |
| <b>P value</b>    | 0.0023    |      | 0.0073  |      | 0.1360     |      | 0.0021  |       | 0.1979  |       | 0.0002  |      | 0.0020         |       | 1.08E-05        |      |

**FUCOSE**

|                   | Succinate |      | Formate |      | Propionate |      | Ethanol |      | Lactate |      | Acetate |      | H <sub>2</sub> |      | CO <sub>2</sub> |      |
|-------------------|-----------|------|---------|------|------------|------|---------|------|---------|------|---------|------|----------------|------|-----------------|------|
|                   | C         | F    | C       | F    | C          | F    | C       | F    | C       | F    | C       | F    | C              | F    | C               | F    |
| <b>Mean value</b> | 0.00      | 1.61 | 1.53    | 3.32 | 7.04       | 16.2 | 2.41    | 0.00 | -3.11   | -2.3 | 13.3    | 21.9 | 1.39           | 3.51 | 23.1            | 27.6 |
| <b>variance</b>   | 0.00      | 1.94 | 0.13    | 0.08 | 0.24       | 3.16 | 9.45    | 0.00 | 0.06    | 0.21 | 1.11    | 4.42 | 0.19           | 0.54 | 8.72            | 14.1 |
| <b>P value</b>    | 0.1836    |      | 0.0024  |      | 0.0132     |      | 0.3073  |      | 0.0710  |      | 0.0080  |      | 0.0233         |      | 0.1760          |      |

**GALACTOSE**

|                   | Succinate |      | Formate |      | Propionate |      | Ethanol |       | Lactate |       | Acetate |      | H <sub>2</sub> |      | CO <sub>2</sub> |      |
|-------------------|-----------|------|---------|------|------------|------|---------|-------|---------|-------|---------|------|----------------|------|-----------------|------|
|                   | C         | Ga   | C       | Ga   | C          | Ga   | C       | Ga    | C       | Ga    | C       | Ga   | C              | Ga   | C               | Ga   |
| <b>Mean value</b> | 0.00      | 9.71 | 1.53    | 2.26 | 7.04       | 9.67 | 2.41    | 33.47 | -3.11   | -2.24 | 13.3    | 37.3 | 1.39           | 57.9 | 23.1            | 89.3 |
| <b>variance</b>   | 0.00      | 0.60 | 0.13    | 0.27 | 0.24       | 0.20 | 9.45    | 23.76 | 0.06    | 0.00  | 1.11    | 4.97 | 0.19           | 165  | 8.72            | 234  |
| <b>P value</b>    | 0.0021    |      | 0.1149  |      | 0.0024     |      | 0.0026  |       | 0.0249  |       | 0.0005  |      | 0.0168         |      | 0.0179          |      |

**GLUCOSE**

|                   | Succinate |      | Formate |    | Propionate |       | Ethanol |       | Lactate |      | Acetate |      | H <sub>2</sub> |      | CO <sub>2</sub> |      |
|-------------------|-----------|------|---------|----|------------|-------|---------|-------|---------|------|---------|------|----------------|------|-----------------|------|
|                   | C         | GI   | C       | GI | C          | GI    | C       | GI    | C       | GI   | C       | GI   | C              | GI   | C               | GI   |
| <b>Mean value</b> | 0.00      | 0.00 | 1.53    | 0  | 7.04       | 10.56 | 2.41    | 36.44 | -3.11   | 10.1 | 13.3    | 40.2 | 1.39           | 65.6 | 23.1            | 88.7 |
| <b>variance</b>   | 0.00      | 0.00 | 0.13    | 0  | 0.24       | 2.28  | 9.45    | 17.3  | 0.06    | 3.75 | 1.11    | 15.5 | 0.19           | 70.4 | 8.72            | 28.2 |
| <b>P value</b>    | -         |      | 0.0178  |    | 0.0617     |       | 0.0003  |       | 0.0071  |      | 0.0075  |      | 0.0057         |      | 0.0003          |      |

**MALTOSE**

|                   | Succinate |      | Formate |      | Propionate |      | Ethanol |      | Lactate |      | Acetate |         | H <sub>2</sub> |      | CO <sub>2</sub> |      |
|-------------------|-----------|------|---------|------|------------|------|---------|------|---------|------|---------|---------|----------------|------|-----------------|------|
|                   | C         | Mt   | C       | Mt   | C          | Mt   | C       | Mt   | C       | Mt   | C       | Mt      | C              | Mt   | C               | Mt   |
| <b>Mean value</b> | 0.00      | 0.00 | 1.53    | 0.00 | 7.04       | 15.5 | 2.41    | 71.2 | -3.11   | 36   | 13.3    | 56.095  | 1.39           | 110  | 23.1            | 140  |
| <b>variance</b>   | 0.00      | 0.00 | 0.13    | 0.00 | 0.24       | 9.69 | 9.45    | 472  | 0.06    | 21.6 | 1.11    | 126.145 | 0.19           | 66.2 | 8.72            | 91.3 |
| <b>P value</b>    | -         |      | 0.0178  |      | 0.043      |      | 0.0323  |      | 0.0047  |      | 0.0224  |         | 0.0019         |      | 0.0024          |      |

**MANNOSE**

|                   | Succinate |      | Formate |      | Propionate |      | Ethanol |      | Lactate |       | Acetate |      | H <sub>2</sub> |      | CO <sub>2</sub> |      |
|-------------------|-----------|------|---------|------|------------|------|---------|------|---------|-------|---------|------|----------------|------|-----------------|------|
|                   | C         | Mn   | C       | Mn   | C          | Mn   | C       | Mn   | C       | Mn    | C       | Mn   | C              | Mn   | C               | Mn   |
| <b>Mean value</b> | 0.00      | 12.4 | 1.53    | 0.29 | 7.04       | 13.7 | 2.41    | 42.5 | -3.11   | -2.89 | 13.3    | 40.3 | 1.39           | 70.8 | 23.1            | 89.5 |
| <b>variance</b>   | 0.00      | 0.55 | 0.13    | 0.26 | 0.24       | 0.62 | 9.45    | 108  | 0.06    | 0.06  | 1.11    | 3.3  | 0.19           | 12.2 | 8.72            | 59.1 |
| <b>P value</b>    | 0.0012    |      | 0.0263  |      | 0.0011     |      | 0.0236  |      | 0.3458  |       | 0.0002  |      | 0.0009         |      | 0.0008          |      |

## RHAMNOSE

|                   | Succinate |      | Formate |      | Propionate |       | Ethanol |   | Lactate |      | Acetate |      | H <sub>2</sub> |      | CO <sub>2</sub> |      |
|-------------------|-----------|------|---------|------|------------|-------|---------|---|---------|------|---------|------|----------------|------|-----------------|------|
|                   | C         | R    | C       | R    | C          | R     | C       | R | C       | R    | C       | R    | C              | R    | C               | R    |
| <b>Mean value</b> | 0         | 3.59 | 1.53    | 0.29 | 7.04       | 28.35 | 2.41    | 0 | -3.11   | 2.27 | 13.3    | 27.9 | 1.39           | 12.4 | 23.1            | 53.8 |
| <b>variance</b>   | 0         | 0.02 | 0.13    | 0.25 | 0.24       | 7.31  | 9.45    | 0 | 0.06    | 0.51 | 1.11    | 32.5 | 0.19           | 1.22 | 8.72            | 11.2 |
| <b>P value</b>    | 0.0006    |      | 0.0253  |      | 0.0055     |       | 0.3073  |   | 0.0065  |      | 0.0487  |      | 0.0005         |      | 0.0003          |      |

## XYLOSE

|                   | Succinate |      | Formate |      | Propionate |   | Ethanol |      | Lactate |       | Acetate |      | H <sub>2</sub> |      | CO <sub>2</sub> |      |
|-------------------|-----------|------|---------|------|------------|---|---------|------|---------|-------|---------|------|----------------|------|-----------------|------|
|                   | C         | X    | C       | X    | C          | X | C       | X    | C       | X     | C       | X    | C              | X    | C               | X    |
| <b>Mean value</b> | 0         | 2.81 | 1.53    | 14.6 | 7.04       | 0 | 2.41    | 27   | -3.11   | -2.54 | 13.3    | 31.2 | 1.39           | 31.5 | 23.1            | 59.7 |
| <b>variance</b>   | 0         | 4.63 | 0.13    | 5.77 | 0.24       | 0 | 9.45    | 31.5 | 0.06    | 0.36  | 1.11    | 28.7 | 0.19           | 7.74 | 8.72            | 24.6 |
| <b>P value</b>    | 0.1517    |      | 0.0113  |      | 0.0016     |   | 0.007   |      | 0.2233  |       | 0.0295  |      | 0.0029         |      | 0.0016          |      |

## (B) Time-resolved fermentation of glucose (main data are in Figure 3)

|                   | Succinate |      | Formate |       | Ethanol |      | Lactate |      | Acetate |      | H <sub>2</sub> |     | CO <sub>2</sub> |     |
|-------------------|-----------|------|---------|-------|---------|------|---------|------|---------|------|----------------|-----|-----------------|-----|
|                   | C         | GI   | C       | GI    | C       | GI   | C       | GI   | C       | GI   | C              | GI  | C               | GI  |
| <b>Mean value</b> | 0.1       | 4.41 | -6.94   | -3.82 | 0       | 54.6 | 0.31    | 21.2 | 6.76    | 41.1 | 2.15           | 158 | 23.3            | 162 |
| <b>variance</b>   | 0.07      | 0.66 | 1.16    | 1.43  | 0       | 101  | 0.07    | 69.3 | 0.21    | 31.8 | 0.37           | 447 | 0.13            | 447 |
| <b>P value</b>    | 0.0203    |      | 0.0284  |       | 0.0112  |      | 0.049   |      | 0.0089  |      | 0.006          |     | 0.0076          |     |

<sup>a</sup>Abbreviations: Pre, pre-incubation; C, unsupplemented control; A, arabinose-supplemented; F, fucose-supplemented; Ga, galactose-supplemented; GI, glucose-supplemented; Mt, maltose-supplemented; Mn, mannose-supplemented; R, rhamnose-supplemented; X, xylose-supplemented.

<sup>b</sup>p-values were calculated by t-Test with different variances. Values are significant by  $p \leq 0.05$ .

**Table S2. pH data of the (A) different saccharide treatments and (B) time-resolved fermentation of glucose.<sup>a</sup>**

| A                  | Treatment              | pH                     |                 |
|--------------------|------------------------|------------------------|-----------------|
|                    |                        | Pre-incubation         | Post-incubation |
| <b>Gut Content</b> | Unsupplemented Control | 7.10 ± 0.01            | 7.15 ± 0.01     |
|                    | Arabinose              | 7.10 ± 0.01            | 6.75 ± 0.01     |
|                    | Fucose                 | 7.08 ± 0.01            | 6.95 ± 0.02     |
|                    | Galactose              | 7.08 ± 0.01            | 6.72 ± 0.07     |
|                    | Glucose                | 7.09 ± 0.01            | 6.70 ± 0.04     |
|                    | Maltose                | 7.09 ± 0.01            | 6.22 ± 0.06     |
|                    | Mannose                | 7.08 ± 0.01            | 6.67 ± 0.04     |
|                    | Rhamnose               | 7.06 ± 0.03            | 6.69 ± 0.00     |
|                    | Xylose                 | 7.08 ± 0.01            | 6.78 ± 0.02     |
|                    | <b>Soil</b>            | Unsupplemented Control | 7.03 ± 0.01     |
| Arabinose          |                        | 6.98 ± 0.07            | 7.03 ± 0.01     |
| Fucose             |                        | 7.00 ± 0.01            | 7.03 ± 0.02     |
| Galactose          |                        | 6.98 ± 0.06            | 7.02 ± 0.01     |
| Glucose            |                        | 6.99 ± 0.03            | 6.97 ± 0.02     |
| Maltose            |                        | 7.02 ± 0.02            | 6.97 ± 0.02     |
| Mannose            |                        | 7.04 ± 0.05            | 6.98 ± 0.03     |
| Rhamnose           |                        | 7.02 ± 0.01            | 7.02 ± 0.00     |
| Xylose             |                        | 7.04 ± 0.01            | 7.03 ± 0.01     |
| <b>B</b>           |                        |                        |                 |
| <b>Gut Content</b> | Unsupplemented Control | 7.09 ± 0.01            | 6.60 ± 0.67     |
|                    | Glucose                | 7.10 ± 0.01            | 6.38 ± 0.12     |

<sup>a</sup>Values are calculated from three replicate analyses; values and standard deviations are rounded to the nearest second decimal place.



**Table S3. Recoveries of carbon (C) and reducing equivalents (e<sup>-</sup>) of the different saccharide treatments.**

| Product         | Recoveries (%) <sup>a</sup> |                |        |                |           |                |         |                |         |                |         |                |          |                |        |                |
|-----------------|-----------------------------|----------------|--------|----------------|-----------|----------------|---------|----------------|---------|----------------|---------|----------------|----------|----------------|--------|----------------|
|                 | Arabinose                   |                | Fucose |                | Galactose |                | Glucose |                | Maltose |                | Mannose |                | Rhamnose |                | Xylose |                |
|                 | C                           | e <sup>-</sup> | C      | e <sup>-</sup> | C         | e <sup>-</sup> | C       | e <sup>-</sup> | C       | e <sup>-</sup> | C       | e <sup>-</sup> | C        | e <sup>-</sup> | C      | e <sup>-</sup> |
| Succinate       | 12                          | 11             | 5      | 4              | 13        | 12             | 0       | 0              | 0       | 0              | 16      | 14             | 5        | 4              | 5      | 4              |
| Formate         | <1                          | <1             | 1      | 1              | <1        | <1             | 0       | 0              | 0       | 0              | 0       | 0              | 0        | 0              | 6      | 3              |
| Propionate      | 3                           | 3              | 23     | 25             | 3         | 3              | 3       | 4              | 4       | 5              | 6       | 7              | 22       | 24             | 0      | 0              |
| Ethanol         | 26                          | 40             | 0      | 0              | 21        | 32             | 21      | 31             | 22      | 33             | 26      | 38             | 0        | 0              | 21     | 32             |
| Acetate         | 21                          | 21             | 14     | 13             | 17        | 17             | 17      | 17             | 14      | 14             | 17      | 17             | 10       | 9              | 16     | 16             |
| Lactate         | 0                           | 0              | 0      | 0              | 0         | 0              | 12      | 12             | 19      | 19             | 0       | 0              | 6        | 5              | 0      | 0              |
| CO <sub>2</sub> | 22                          | n.a.           | 4      | n.a.           | 23        | n.a.           | 20      | n.a.           | 19      | n.a.           | 21      | n.a.           | 11       | n.a.           | 16     | n.a.           |
| H <sub>2</sub>  | n.a.                        | 9              | n.a.   | 1              | n.a.      | 10             | n.a.    | 10             | n.a.    | 9              | n.a.    | 11             | n.a.     | 2              | n.a.   | 7              |
| Total           | 84                          | 84             | 47     | 44             | 77        | 74             | 73      | 74             | 78      | 80             | 86      | 87             | 54       | 44             | 64     | 62             |

<sup>a</sup>Recoveries were calculated from the fermentation profiles displayed in Figure 1 and Table 1, and values were rounded to the nearest whole number.

Abbreviations: n.a., not applicable.

**Table S4. Summary of all detected phlotypes of the different saccharide treatments (the most abundant phlotypes are evaluated in Table 2).<sup>a</sup>**

| Phylum, Family              | Relative Abundance (%) <sup>b, c</sup> |      |      |      |      |      |      |      |      |      | No. of<br>Phylo-<br>types |
|-----------------------------|----------------------------------------|------|------|------|------|------|------|------|------|------|---------------------------|
|                             | Pre                                    | C    | A    | F    | Ga   | GI   | Mt   | Mn   | R    | X    |                           |
| <i>Acidobacteria,</i>       |                                        |      |      |      |      |      |      |      |      |      |                           |
| Unassigned Families         | 1.85                                   | 0.35 | 0.11 | 0.23 | 0.12 | 0.04 | 0.05 | 0.08 | 0.06 | 0.11 | 3                         |
| <i>Actinobacteria,</i>      |                                        |      |      |      |      |      |      |      |      |      |                           |
| <i>Acidimicrobiaceae</i>    | 1.20                                   | 0.22 | 0.08 | 0.16 | 0.10 | 0.04 | 0.04 | 0.07 | 0.06 | 0.09 | 3                         |
| <i>Cellulomonadaceae</i>    | 0.36                                   | 0.11 | 0.05 | 0.09 | 0.06 | 0.02 | 0.02 | 0.03 | 0.02 | 0.05 | 1                         |
| <i>Gaiellaceae</i>          | 2.72                                   | 0.35 | 0.10 | 0.23 | 0.11 | 0.05 | 0.05 | 0.08 | 0.08 | 0.10 | 3                         |
| <i>Intrasporangiaceae</i>   | 0.32                                   | 0.09 | 0.03 | 0.05 | 0.03 | 0.02 | 0.01 | 0.02 | 0.02 | 0.02 | 1                         |
| <i>Microbacteriaceae</i>    | 0.57                                   | 0.11 | 0.04 | 0.10 | 0.04 | 0.02 | 0.01 | 0.05 | 0.02 | 0.05 | 2                         |
| <i>Micrococcaceae</i>       | 0.89                                   | 0.12 | 0.05 | 0.07 | 0.04 | 0.01 | 0.01 | 0.02 | 0.02 | 0.04 | 1                         |
| <i>Mycobacteriaceae</i>     | 0.50                                   | 0.07 | 0.01 | 0.05 | 0.02 | 0.01 | 0.01 | 0.01 | 0.01 | 0.02 | 1                         |
| <i>Nakamurellaceae</i>      | 0.29                                   | 0.05 | 0.01 | 0.04 | 0.02 | 0.00 | 0.00 | 0.01 | 0.01 | 0.02 | 1                         |
| <i>Nocardoidaceae</i>       | 2.61                                   | 0.32 | 0.12 | 0.23 | 0.12 | 0.04 | 0.03 | 0.09 | 0.08 | 0.11 | 2                         |
| <i>Patulibacteraceae</i>    | 0.94                                   | 0.12 | 0.05 | 0.12 | 0.04 | 0.02 | 0.01 | 0.03 | 0.03 | 0.04 | 1                         |
| <i>Propionibacteriaceae</i> | 1.71                                   | 0.19 | 0.06 | 0.14 | 0.08 | 0.03 | 0.03 | 0.05 | 0.05 | 0.10 | 2                         |
| <i>Pseudonocardiaceae</i>   | 1.90                                   | 0.30 | 0.08 | 0.23 | 0.08 | 0.04 | 0.03 | 0.08 | 0.07 | 0.10 | 2                         |
| <i>Solirubrobacteraceae</i> | 6.59                                   | 1.18 | 0.37 | 0.69 | 0.32 | 0.16 | 0.13 | 0.26 | 0.24 | 0.40 | 4                         |
| Unassigned Families         | 6.45                                   | 0.89 | 0.32 | 0.61 | 0.31 | 0.13 | 0.14 | 0.23 | 0.21 | 0.35 | 7                         |
| <i>Bacteroidetes,</i>       |                                        |      |      |      |      |      |      |      |      |      |                           |
| <i>Flavobacteriaceae</i>    | 0.04                                   | 0.61 | 0.44 | 0.63 | 0.96 | 0.14 | 0.08 | 0.24 | 0.13 | 0.41 | 4                         |

*Chloroflexi,*

|                        |      |      |      |      |      |      |      |      |      |      |   |
|------------------------|------|------|------|------|------|------|------|------|------|------|---|
| <i>Chloroflexaceae</i> | 0.50 | 0.05 | 0.01 | 0.05 | 0.02 | 0.01 | 0.01 | 0.01 | 0.01 | 0.02 | 1 |
| Unassigned Families    | 6.20 | 0.76 | 0.28 | 0.61 | 0.23 | 0.12 | 0.12 | 0.16 | 0.19 | 0.28 | 7 |

*Firmicutes,*

|                              |      |      |      |      |      |      |      |      |      |      |   |
|------------------------------|------|------|------|------|------|------|------|------|------|------|---|
| <i>Bacillaceae</i>           | 2.74 | 0.56 | 0.21 | 0.35 | 0.13 | 0.09 | 0.08 | 0.13 | 0.07 | 0.12 | 3 |
| <i>Clostridiaceae</i>        | 0.23 | 2.05 | 0.78 | 1.17 | 0.39 | 0.50 | 0.41 | 0.65 | 0.50 | 0.67 | 3 |
| <i>Lachnospiraceae</i>       | 0.00 | 0.81 | 0.14 | 0.27 | 0.08 | 0.15 | 0.00 | 0.11 | 0.02 | 0.12 | 1 |
| <i>Peptostreptococcaceae</i> | 0.14 | 7.33 | 1.97 | 4.21 | 1.05 | 1.15 | 0.53 | 1.85 | 1.33 | 1.76 | 5 |

*Fusobacteria,*

|                   |      |      |      |      |      |      |      |      |      |      |   |
|-------------------|------|------|------|------|------|------|------|------|------|------|---|
| Unassigned Family | 0.00 | 4.57 | 0.99 | 1.49 | 0.70 | 0.69 | 0.04 | 0.64 | 1.19 | 3.27 | 1 |
|-------------------|------|------|------|------|------|------|------|------|------|------|---|

*Nitrospirae,*

|                     |      |      |      |      |      |      |      |      |      |      |   |
|---------------------|------|------|------|------|------|------|------|------|------|------|---|
| Unassigned Families | 2.57 | 0.51 | 0.13 | 0.40 | 0.10 | 0.06 | 0.06 | 0.11 | 0.08 | 0.13 | 4 |
|---------------------|------|------|------|------|------|------|------|------|------|------|---|

*Planctomycetes,*

|                          |      |      |      |      |      |      |      |      |      |      |   |
|--------------------------|------|------|------|------|------|------|------|------|------|------|---|
| <i>Planctomycetaceae</i> | 7.54 | 0.85 | 0.25 | 0.62 | 0.32 | 0.11 | 0.13 | 0.18 | 0.18 | 0.35 | 8 |
|--------------------------|------|------|------|------|------|------|------|------|------|------|---|

*Proteobacteria,*

|                            |      |       |       |       |       |       |       |       |       |       |    |
|----------------------------|------|-------|-------|-------|-------|-------|-------|-------|-------|-------|----|
| <i>Aeromonadaceae</i>      | 0.14 | 62.37 | 39.32 | 45.81 | 52.78 | 81.65 | 83.49 | 82.94 | 84.43 | 58.72 | 15 |
| <i>Bradyrhizobiaceae</i>   | 5.48 | 0.84  | 0.20  | 0.54  | 0.26  | 0.11  | 0.09  | 0.15  | 0.17  | 0.25  | 1  |
| <i>Comamonadaceae</i>      | 0.48 | 0.11  | 0.05  | 0.10  | 0.03  | 0.02  | 0.02  | 0.02  | 0.03  | 0.04  | 3  |
| <i>Enterobacteriaceae</i>  | 0.14 | 6.05  | 50.93 | 34.50 | 37.80 | 12.88 | 12.77 | 8.66  | 7.79  | 27.25 | 6  |
| <i>Methylobacteriaceae</i> | 0.75 | 0.10  | 0.03  | 0.06  | 0.01  | 0.02  | 0.01  | 0.02  | 0.01  | 0.02  | 1  |
| <i>Nitrospinaceae</i>      | 1.90 | 0.84  | 0.24  | 0.59  | 0.29  | 0.12  | 0.11  | 0.18  | 0.15  | 0.32  | 2  |
| <i>Phyllobacteriaceae</i>  | 0.71 | 0.08  | 0.03  | 0.07  | 0.03  | 0.01  | 0.01  | 0.02  | 0.02  | 0.05  | 1  |
| <i>Pseudomonadaceae</i>    | 0.02 | 0.28  | 0.07  | 0.10  | 0.05  | 0.03  | 0.03  | 0.04  | 0.04  | 0.06  | 2  |
| <i>Rhodobacteraceae</i>    | 0.30 | 0.04  | 0.02  | 0.02  | 0.01  | 0.01  | 0.00  | 0.01  | 0.01  | 0.01  | 1  |
| <i>Rhodobiaceae</i>        | 1.25 | 0.14  | 0.05  | 0.08  | 0.04  | 0.01  | 0.03  | 0.03  | 0.03  | 0.05  | 1  |
| <i>Rhodocyclaceae</i>      | 0.00 | 0.05  | 0.01  | 0.05  | 0.02  | 0.01  | 0.00  | 0.01  | 0.01  | 0.01  | 1  |

|                          |       |      |      |      |      |      |      |      |      |      |    |
|--------------------------|-------|------|------|------|------|------|------|------|------|------|----|
| <i>Rhodospirillaceae</i> | 8.00  | 1.19 | 0.30 | 0.75 | 0.32 | 0.13 | 0.13 | 0.23 | 0.22 | 0.36 | 7  |
| <i>Shewanellaceae</i>    | 0.00  | 1.00 | 0.61 | 1.33 | 1.09 | 0.19 | 0.09 | 0.39 | 0.74 | 1.62 | 1  |
| <i>Xanthobacteraceae</i> | 7.50  | 0.93 | 0.27 | 0.65 | 0.27 | 0.10 | 0.11 | 0.22 | 0.18 | 0.29 | 5  |
| Unassigned Families      | 4.73  | 0.99 | 0.35 | 0.73 | 0.44 | 0.42 | 0.40 | 0.53 | 0.47 | 0.40 | 11 |
| <i>Thaumarchaeota,</i>   |       |      |      |      |      |      |      |      |      |      |    |
| Unassigned Families      | 2.55  | 0.30 | 0.10 | 0.22 | 0.15 | 0.05 | 0.05 | 0.09 | 0.09 | 0.16 | 3  |
| <i>Tenericutes,</i>      |       |      |      |      |      |      |      |      |      |      |    |
| <i>Mycoplasmataceae</i>  | 11.96 | 1.46 | 0.54 | 1.15 | 0.65 | 0.46 | 0.50 | 1.08 | 0.78 | 1.37 | 2  |
| <i>Verrucomicrobia,</i>  |       |      |      |      |      |      |      |      |      |      |    |
| Unassigned Families      | 5.21  | 0.63 | 0.20 | 0.42 | 0.26 | 0.13 | 0.11 | 0.19 | 0.16 | 0.28 | 2  |

<sup>a</sup>See accompanying supplemental text for information on the less abundant families.

<sup>b</sup>Values are rounded to the nearest second decimal place.

<sup>c</sup>Abbreviations: Pre, pre-incubation; C, unsupplemented control; A, arabinose-supplemented; F, fucose-supplemented; Ga, galactose-supplemented; Gl, glucose-supplemented; Mt, maltose-supplemented; Mn, mannose-supplemented; R, rhamnose-supplemented; X, xylose-supplemented;

**Table S5. Summary of all detected phylotypes during the time-resolved fermentation of glucose (the most abundant phylotypes are evaluated in Table 3).<sup>a</sup>**

| Phylum, Family               | Relative Abundance (%) <sup>b, c</sup> |       |      |       |      |       |      | No. of Phylotypes |
|------------------------------|----------------------------------------|-------|------|-------|------|-------|------|-------------------|
|                              | 10 h                                   |       | 20 h |       | 30 h |       |      |                   |
|                              | Pre                                    | C     | G    | C     | G    | C     | G    |                   |
| <i>Acidobacteria</i> ,       |                                        |       |      |       |      |       |      |                   |
| Unassigned families          | 1.92                                   | 0.95  | 0.16 | 0.88  | 0.06 | 0.83  | 0.09 | 3                 |
| <i>Actinobacteria</i> ,      |                                        |       |      |       |      |       |      |                   |
| <i>Acidimicrobiaceae</i>     | 1.03                                   | 0.27  | 0.06 | 0.20  | 0.04 | 0.15  | 0.04 | 3                 |
| <i>Cellulomonadaceae</i>     | 0.68                                   | 0.24  | 0.08 | 0.20  | 0.05 | 0.22  | 0.06 | 1                 |
| <i>Gaiellaceae</i>           | 1.70                                   | 0.27  | 0.05 | 0.24  | 0.04 | 0.19  | 0.04 | 3                 |
| <i>Intrasporangiaceae</i>    | 0.47                                   | 0.24  | 0.03 | 0.21  | 0.01 | 0.15  | 0.02 | 1                 |
| <i>Microbacteriaceae</i>     | 1.71                                   | 0.38  | 0.13 | 0.21  | 0.09 | 0.31  | 0.07 | 2                 |
| <i>Micrococcaceae</i>        | 0.30                                   | 0.14  | 0.02 | 0.11  | 0.02 | 0.10  | 0.02 | 1                 |
| <i>Mycobacteriaceae</i>      | 0.19                                   | 0.12  | 0.01 | 0.11  | 0.01 | 0.09  | 0.01 | 1                 |
| <i>Nakamurellaceae</i>       | 0.37                                   | 0.18  | 0.02 | 0.14  | 0.01 | 0.14  | 0.02 | 1                 |
| <i>Nocardioideaceae</i>      | 1.23                                   | 0.29  | 0.05 | 0.24  | 0.02 | 0.25  | 0.02 | 2                 |
| <i>Patulibacteraceae</i>     | 0.26                                   | 0.10  | 0.02 | 0.10  | 0.01 | 0.10  | 0.01 | 1                 |
| <i>Propionibacteriaceae</i>  | 1.08                                   | 0.42  | 0.07 | 0.33  | 0.04 | 0.30  | 0.05 | 2                 |
| <i>Pseudonocardiaceae</i>    | 0.61                                   | 0.32  | 0.07 | 0.29  | 0.05 | 0.27  | 0.05 | 2                 |
| <i>Solirubrobacteraceae</i>  | 2.05                                   | 1.23  | 0.19 | 1.04  | 0.13 | 1.07  | 0.14 | 4                 |
| Unassigned families          | 3.29                                   | 0.93  | 0.19 | 0.76  | 0.11 | 0.72  | 0.11 | 7                 |
| <i>Bacteroidetes</i> ,       |                                        |       |      |       |      |       |      |                   |
| <i>Flavobacteriaceae</i>     | 14.28                                  | 18.31 | 4.44 | 13.82 | 3.23 | 12.72 | 6.52 | 4                 |
| <i>Chloroflexi</i> ,         |                                        |       |      |       |      |       |      |                   |
| <i>Chloroflexaceae</i>       | 0.22                                   | 0.09  | 0.02 | 0.07  | 0.01 | 0.07  | 0.01 | 1                 |
| Unassigned families          | 6.89                                   | 0.96  | 0.22 | 0.73  | 0.13 | 0.69  | 0.16 | 7                 |
| <i>Firmicutes</i> ,          |                                        |       |      |       |      |       |      |                   |
| <i>Bacillaceae</i>           | 0.44                                   | 0.51  | 0.12 | 0.40  | 0.13 | 0.34  | 0.11 | 3                 |
| <i>Clostridiaceae</i>        | 0.04                                   | 0.57  | 0.03 | 2.43  | 0.10 | 2.71  | 0.44 | 3                 |
| <i>Lachnospiraceae</i>       | 0.00                                   | 0.00  | 0.00 | 0.00  | 0.00 | 0.01  | 0.00 | 1                 |
| <i>Peptostreptococcaceae</i> | 0.07                                   | 4.67  | 0.71 | 10.61 | 1.02 | 14.25 | 2.28 | 5                 |
| <i>Fusobacteria</i> ,        |                                        |       |      |       |      |       |      |                   |
| Unassigned family            | 0.01                                   | 0.21  | 0.02 | 0.60  | 0.02 | 0.84  | 0.02 | 1                 |
| <i>Nitrospirae</i> ,         |                                        |       |      |       |      |       |      |                   |
| Unassigned family            | 1.04                                   | 0.51  | 0.06 | 0.42  | 0.06 | 0.35  | 0.04 | 4                 |

|                            |       |       |       |       |       |       |       |    |
|----------------------------|-------|-------|-------|-------|-------|-------|-------|----|
| <i>Planctomycetes,</i>     |       |       |       |       |       |       |       |    |
| <i>Planctomycetaceae</i>   | 2.08  | 1.51  | 0.25  | 1.25  | 0.17  | 0.95  | 0.18  | 8  |
| <i>Proteobacteria</i>      |       |       |       |       |       |       |       |    |
| <i>Aeromonadaceae</i>      | 8.69  | 45.01 | 78.04 | 43.24 | 69.38 | 41.03 | 63.91 | 15 |
| <i>Bradyrhizobiaceae</i>   | 3.21  | 1.20  | 0.30  | 0.90  | 0.17  | 0.92  | 0.26  | 1  |
| <i>Comamonadaceae</i>      | 2.09  | 0.67  | 0.15  | 0.53  | 0.12  | 0.72  | 0.14  | 3  |
| <i>Enterobacteriaceae</i>  | 1.25  | 5.51  | 11.51 | 6.21  | 22.55 | 6.00  | 22.86 | 6  |
| <i>Methylobacteriaceae</i> | 0.34  | 0.13  | 0.03  | 0.09  | 0.02  | 0.14  | 0.03  | 1  |
| <i>Nitrospinaceae</i>      | 1.68  | 1.15  | 0.17  | 0.94  | 0.08  | 0.63  | 0.10  | 2  |
| <i>Phyllobacteriaceae</i>  | 0.74  | 0.13  | 0.03  | 0.10  | 0.02  | 0.10  | 0.02  | 1  |
| <i>Pseudomonadaceae</i>    | 0.86  | 0.63  | 0.08  | 0.53  | 0.07  | 0.58  | 0.09  | 2  |
| <i>Rhodobacteraceae</i>    | 0.39  | 0.11  | 0.02  | 0.07  | 0.01  | 0.08  | 0.01  | 1  |
| <i>Rhodobiaceae</i>        | 0.68  | 0.17  | 0.03  | 0.13  | 0.02  | 0.10  | 0.02  | 1  |
| <i>Rhodocyclaceae</i>      | 0.07  | 0.39  | 0.07  | 0.31  | 0.05  | 0.38  | 0.11  | 1  |
| <i>Rhodospirillaceae</i>   | 5.06  | 1.59  | 0.24  | 1.55  | 0.22  | 1.30  | 0.23  | 7  |
| <i>Shewanellaceae</i>      | 0.21  | 2.39  | 0.35  | 4.73  | 0.25  | 4.86  | 0.32  | 1  |
| <i>Xanthobacteraceae</i>   | 4.20  | 0.96  | 0.15  | 0.76  | 0.10  | 0.68  | 0.10  | 5  |
| Unassigned families        | 4.14  | 1.75  | 0.49  | 1.54  | 0.47  | 1.52  | 0.47  | 11 |
| <i>Thaumarchaeota</i>      |       |       |       |       |       |       |       |    |
| Unassigned families        | 1.59  | 0.61  | 0.11  | 0.40  | 0.10  | 0.27  | 0.09  | 3  |
| <i>Tenericutes,</i>        |       |       |       |       |       |       |       |    |
| <i>Mycoplasmataceae</i>    | 19.39 | 3.28  | 0.98  | 2.01  | 0.65  | 2.19  | 0.48  | 2  |
| <i>Verrucomicrobia,</i>    |       |       |       |       |       |       |       |    |
| Unassigned families        | 3.44  | 0.90  | 0.25  | 0.56  | 0.19  | 0.70  | 0.27  | 2  |

<sup>a</sup>See accompanying supplemental text for information on the less abundant families.

<sup>b</sup>Values are rounded to the nearest second decimal place.

<sup>c</sup>Abbreviations: Pre, pre-incubation; C, unsupplemented control; G, glucose treatment.

## Additional Information on the Less Abundant Families in Tables S4 and S5

Families that were affiliated to the phylum *Proteobacteria* included *Bradyrhizobiaceae*, *Comamonadaceae*, *Nitrospinaceae*, *Phyllobacteriaceae*, *Rhodobacteraceae*, *Rhodobiaceae*, *Xanthobacteraceae*, and *Pseudomonadaceae* (1–8). These families contain metabolically and ecologically diverse genera that can grow aerobically. The families *Bradyrhizobiaceae*, *Pseudomonadaceae*, and *Xanthobacteraceae* are known for their ability to fix molecular N<sub>2</sub> (1, 6, 7). Chemotrophic members are found in the *Proteobacteria*-affiliated families, but phototrophic members also occur in the families *Bradyrhizobiaceae*, *Comamonadaceae*, *Rhodobacteraceae*, and *Rhodospirillaceae* (1, 2, 4, 9).

Some of the families that were affiliated to the phylum *Actinobacteria* (i.e., *Gaiellaceae*, *Mycobacteriaceae*, *Patulibacteraceae*, and *Solirubrobacteraceae*) are considered to be strictly aerobic (10–12). Other families belonging to this phylum (e.g. *Cellulomonadaceae*) can be aerobic and also facultatively aerobic (13). *Gaiellaceae*, *Microbacteriaceae*, *Patulibacteraceae*, and *Solirubrobacteraceae* are chemoorganotrophic (10, 12, 14).

The phyla *Bacteroidetes*, *Chloroflexi*, *Firmicutes*, and *Planctomycetes* were also detected. The *Firmicutes*-affiliated families *Clostridiaceae* and *Lachnospiraceae* are mainly anaerobic and capable of diverse fermentations (15, 16). Members of the family *Bacillaceae* are aerobes or facultative aerobes (17), and members of the family *Chloroflexaceae* are phototrophs (18). Most members of the *Flavobacteriaceae* related to the phylum *Bacteroidetes* are capable of aerobic growth (19).

### References

1. Garrity GM, Bell JA, Lilburn T. 2005. Family VII. *Bradyrhizobiaceae*, p. 438–476. In Garrity, GM (ed.), *Bergey's manual of systematic bacteriology*, 2nd ed. Springer, New York, NY.
2. Willems A. 2014. The Family *Comamonadaceae*, p. 777–851. In Rosenberg, E, DeLong, EF, Lory, S, Stackebrandt, E, Thompson, F (eds.), *The Prokaryotes*, 4th ed., vol. 8. Springer Berlin Heidelberg, Berlin, Heidelberg.
3. Lückner S, Daims H. 2014. The Family *Nitrospinaceae*, p. 231–237. In Rosenberg, E, DeLong, EF, Lory, S, Stackebrandt, E, Thompson, F (eds.), *The Prokaryotes*, 4th ed., vol. 10. Springer Berlin Heidelberg, Berlin, Heidelberg.
4. Pujalte MJ, Lucena T, Ruvira MA, Arahal DR, Macián MC. 2014. The Family *Rhodobacteraceae*, p. 439–512. In Rosenberg, E, DeLong, EF, Lory, S, Stackebrandt, E,

- Thompson, F (eds.), *The Prokaryotes*, 4th ed., vol. 8. Springer Berlin Heidelberg, Berlin, Heidelberg.
5. Albuquerque L, Rosselló-Móra R, da Costa MS. 2014. The Family *Rhodobiaceae*, p. 513–531. *In* Rosenberg, E, DeLong, EF, Lory, S, Stackebrandt, E, Thompson, F (eds.), *The Prokaryotes*, 4th ed., vol. 8. Springer Berlin Heidelberg, Berlin, Heidelberg.
  6. Oren A. 2014. The Family *Xanthobacteraceae*, p. 709–726. *In* Rosenberg, E, DeLong, EF, Lory, S, Stackebrandt, E, Thompson, F (eds.), *The Prokaryotes*, 4th ed., vol. 8. Springer Berlin Heidelberg, Berlin, Heidelberg.
  7. Garrity GM, Bell JA, Lilburn T. 2005. Family I. *Pseudomonadaceae*, p. 323–411. *In* Garrity, GM (ed.), *Bergey's manual of systematic bacteriology*, 2nd ed., vol. 2. Springer, New York, NY.
  8. Mergaert J, Swings J. 2005. Family IV. *Phyllobacteriaceae*, p. 393–410. *In* *Bergey's manual of systematic bacteriology*, 2nd ed., vol. 2. Springer, New York, NY.
  9. Baldani JI, Videira SS, dos Santos Teixeira KR, Reis VM, de Oliveira ALM, Schwab S, de Souza EM, Pedraza RO, Baldani VLD, Hartmann A. 2014. The Family *Rhodospirillaceae*, p. 533–618. *In* Rosenberg, E, DeLong, EF, Lory, S, Stackebrandt, E, Thompson, F (eds.), *The Prokaryotes* 4th ed., vol. 8. Springer Berlin Heidelberg, Berlin, Heidelberg.
  10. Albuquerque L, da Costa MS. 2014. The Family *Gaiellaceae*, p. 357–360. *In* Rosenberg, E, DeLong, EF, Lory, S, Stackebrandt, E, Thompson, F (eds.), *The Prokaryotes*. Springer Berlin Heidelberg, Berlin, Heidelberg.
  11. Lory S. 2014. The Family *Mycobacteriaceae*, p. 571–575. *In* Rosenberg, E, DeLong, EF, Lory, S, Stackebrandt, E, Thompson, F (eds.), *The Prokaryotes*. Springer Berlin Heidelberg, Berlin, Heidelberg.
  12. Albuquerque L, da Costa MS. 2014. The Families *Conexibacteraceae*, *Patulibacteraceae* and *Solirubrobacteraceae*, p. 185–200. *In* Rosenberg, E, DeLong, EF, Lory, S, Stackebrandt, E, Thompson, F (eds.), *The Prokaryotes*, 4th ed., vol. 6. Springer Berlin Heidelberg, Berlin, Heidelberg.
  13. Stackebrandt E, Schumann P. 2014. The Family *Cellulomonadaceae*, p. 163–184. *In* Rosenberg, E, DeLong, EF, Lory, S, Stackebrandt, E, Thompson, F (eds.), *The Prokaryotes*, 4th ed., vol. 6. Springer Berlin Heidelberg, Berlin, Heidelberg.
  14. Evtushenko LI. 2012. Family XI: *Microbacteriaceae*, p. 807–994. *In* Whitman, WB, Parte, AC (eds.), *Bergey's manual of systematic bacteriology*, 2nd ed., vol. 5. Springer, New York, NY.
  15. Stackebrandt E. 2014. The Family *Clostridiaceae*, Other Genera, p. 67–73. *In* Rosenberg, E, DeLong, EF, Lory, S, Stackebrandt, E, Thompson, F (eds.), *The Prokaryotes*, 4th ed., vol. 7. Springer Berlin Heidelberg, Berlin, Heidelberg.
  16. Stackebrandt E. 2014. The Family *Lachnospiraceae*, p. 197–201. *In* Rosenberg, E, DeLong, EF, Lory, S, Stackebrandt, E, Thompson, F (eds.), *The Prokaryotes*, 4th ed., vol. 7. Springer Berlin Heidelberg, Berlin, Heidelberg.
  17. Logan NA, De Vos P. 2009. Family I. *Bacillaceae*, p. 20–228. *In* Whitman, WB, Parte, AC (eds.), *Bergey's manual of systematic bacteriology*, 2nd ed., vol. 3. Springer, New York, NY.



18. Hanada S. 2014. The Phylum *Chloroflexi*, the family *Chloroflexaceae*, and the related phototrophic families *Oscillochloridaceae* and *Roseiflexaceae*, p. 515–532. *In* Rosenberg, E, DeLong, EF, Lory, S, Stackebrandt, E, Thompson, F (eds.), *The Prokaryotes*, 4th ed., vol. 11. Springer Berlin Heidelberg, Berlin, Heidelberg.
19. McBride MJ. 2014. The Family *Flavobacteriaceae*, p. 643–676. *In* Rosenberg, E, DeLong, EF, Lory, S, Stackebrandt, E, Thompson, F (eds.), *The Prokaryotes*, 4th ed., vol. 11. Springer Berlin Heidelberg, Berlin, Heidelberg.
